# Supplementary material for: Theoretical investigations on the formation of nitrobenzanthrone-DNA Adducts
Source: Royal Society of Chemistry journal article supplement (doi:10.1039/c1ob05570d), 2011-01-01
Supplement: c1ob05570d.pdf [file c1ob05570d.pdf]

## Supplementary Information

**Scheme S1** Reaction cascade of the electrophilic attack of the aryl nitrenium ions of 2-NBA and 3-NBA on the exocyclic amine in guanine. The numbers correspond to the values in Table S1.

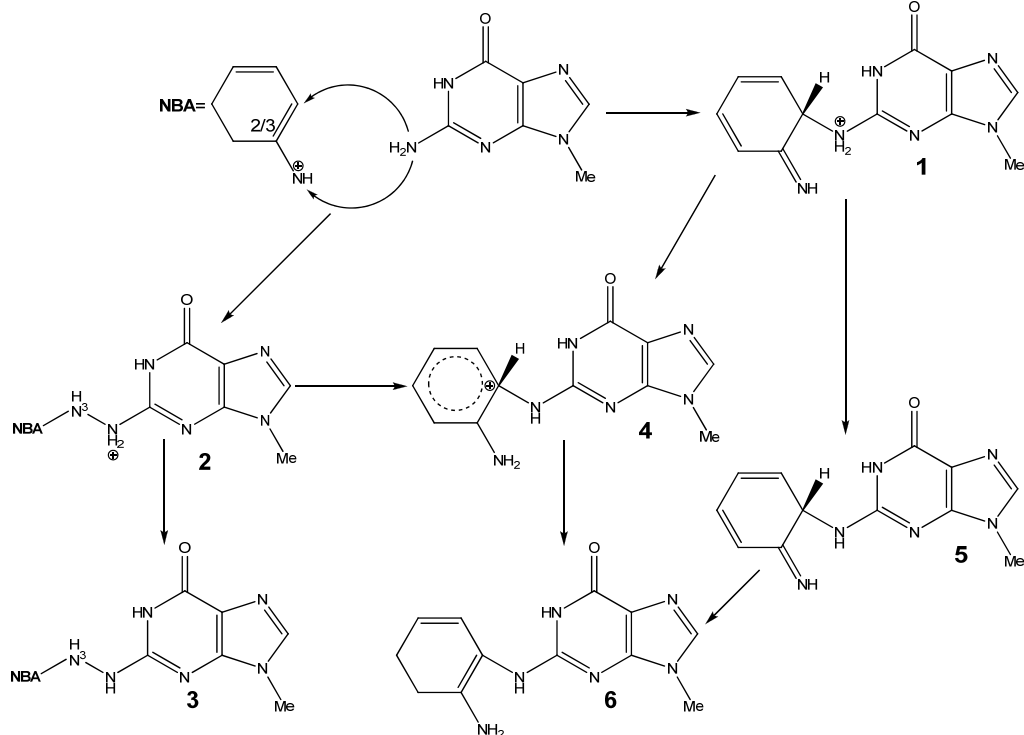

**Table S1.** The single point and zero point vibrational energies (ZPE) of the structurally optimized molecules in Hartrees (a.u.). The molecular structures are shown in Schemes S1.

| System       | Energy / a.u. | ZPE / a.u.   |
|--------------|---------------|--------------|
| Guanine      | -582.0514962  | 0.141935449  |
| Adenine      | -506.7892679  | 0.137285412  |
| 3-NBA-ion    | -783.7774724  | 0.218151745  |
| 2-NBA-ion    | -783.7574330  | 0.218151745  |
| <b>2-NBA</b> |               |              |
| 1            | -1365.842707  | 0.363921539  |
| 2            | -1365.816976  | 0.218151745  |
| 3            | -1365.491147  | 0.352240073  |
| 4            | -1365.874299  | -1339.103163 |
| 5            | -1365.483837  | 0.352093993  |
| 6            | -1365.525838  | 0.352317524  |
| <b>3-NBA</b> |               |              |
| 1            | -1365.839419  | 0.364249973  |
| 2            | -1365.814527  | 0.364005853  |
| 3            | -1365.489293  | 0.352610664  |
| 4            | -1365.866542  | 0.364304875  |
| 5            | -1365.480049  | 0.352242034  |
| 6            | -1365.522357  | 0.351580264  |

**Scheme S2** Reaction cascade of the electrophilic attack of the arylnitrenium ions of 2-NBA and 3-NBA on C8 in guanine. The numbers correspond to the values in Table S2.

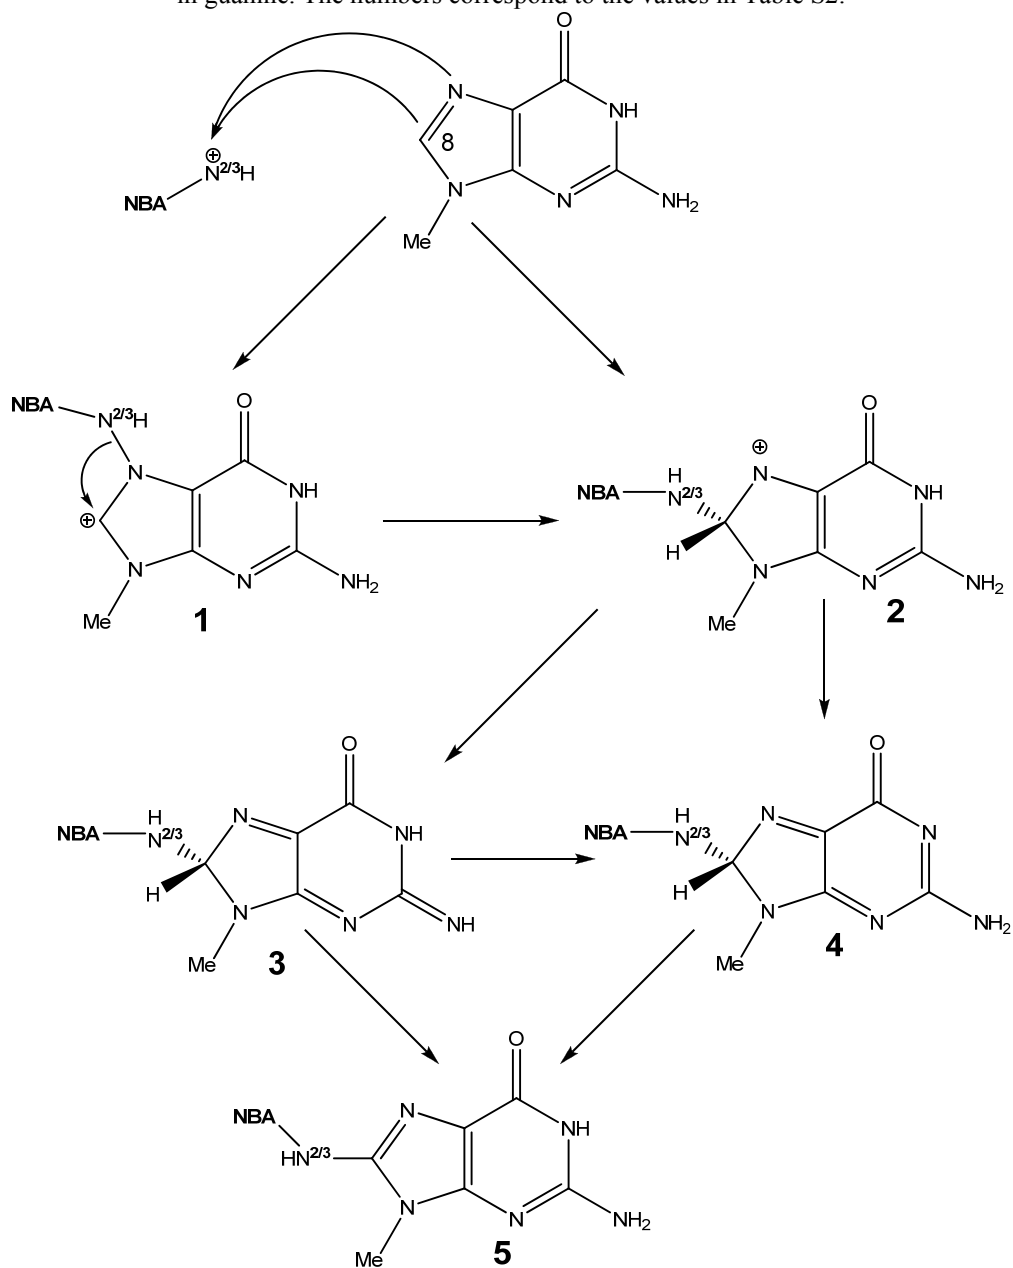

**Table S2.** The single point and zero point vibrational energies (ZPE) of the structurally optimized molecules in Hartrees (a.u.). The molecular structures are shown in Schemes S2.

| System       | Energy / a.u. | ZPE / a.u.  |
|--------------|---------------|-------------|
| <b>2-NBA</b> |               |             |
| 1            | -1365.878520  | 0.364155854 |
| 2            | -1365.844473  | 0.363552908 |
| 3            | -1365.473519  | 0.351241045 |
| 4            | -1365.479107  | 0.35088614  |
| 5            | -1365.533236  | 0.351720461 |
| <b>3-NBA</b> |               |             |
| 1            | -1365.877760  | 0.364048991 |
| 2            | -1365.871653  | 0.363661733 |
| 3            | -1365.470659  | 0.351169476 |
| 4            | -1365.477525  | 0.350868493 |
| 5            | -1365.531843  | 0.352042032 |

**Scheme S3** Reaction cascade of the electrophilic attack of the arylnitrenium ions of 2-NBA and 3-NBA on C8 in guanine. The numbers correspond to the values in Table S3.

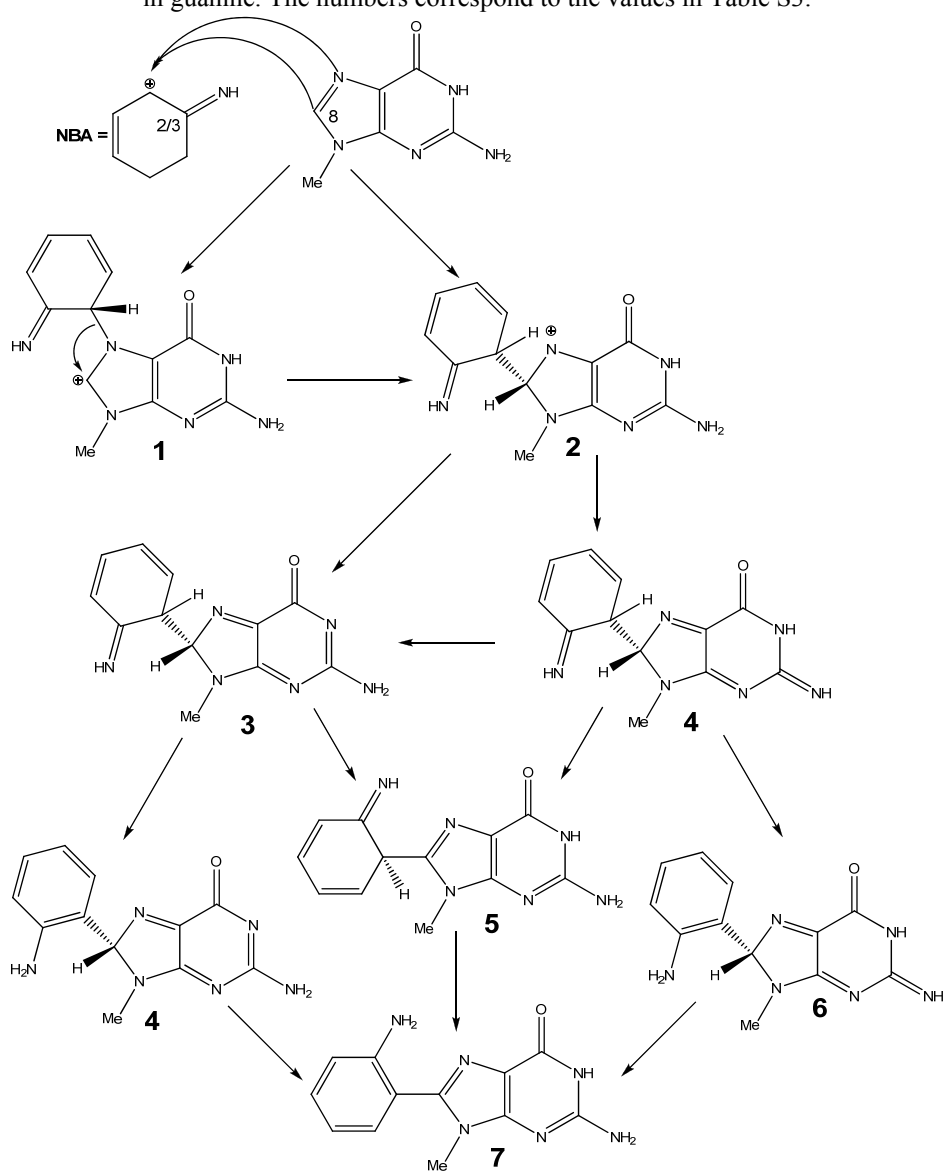

**Table S3.** The single point and zero point vibrational energies (ZPE) of the structurally optimized molecules in Hartrees (a.u.). The molecular structures are shown in Schemes S3.

| System       | Energy / a.u. | ZPE / a.u.   |
|--------------|---------------|--------------|
| <b>2-NBA</b> |               |              |
| 1            | -1365.888817  | -1339.117396 |
| 2            | -1365.854094  | -1339.083354 |
| 3            | -1365.454025  | 0.350534177  |
| 4            | -1365.447653  | 0.350864572  |
| 5            | -1365.482760  | 0.35125281   |
| 6            | -1365.499636  | 0.351933208  |
| 7            | -1365.475438  | 0.351542028  |
| 8            | -1365.539543  | 0.352447918  |
| <b>3-NBA</b> |               |              |
| 1            | -1365.887879  | 0.363861734  |
| 2            | -1365.850059  | 0.363580360  |
| 3            | -1365.450543  | 0.350731237  |
| 4            | -1365.442922  | 0.350967514  |
| 5            | -1365.488205  | 0.350991043  |
| 6            | -1365.495455  | 0.352062620  |
| 7            | -1365.477958  | 0.350854768  |
| 8            | -1365.537356  | 0.352333211  |

**Scheme S4** Reaction cascade of the electrophilic attack of the arylnitrenium ions of 3-NBA on the exocyclic amine in adenine. The numbers correspond to the values in Table S4.

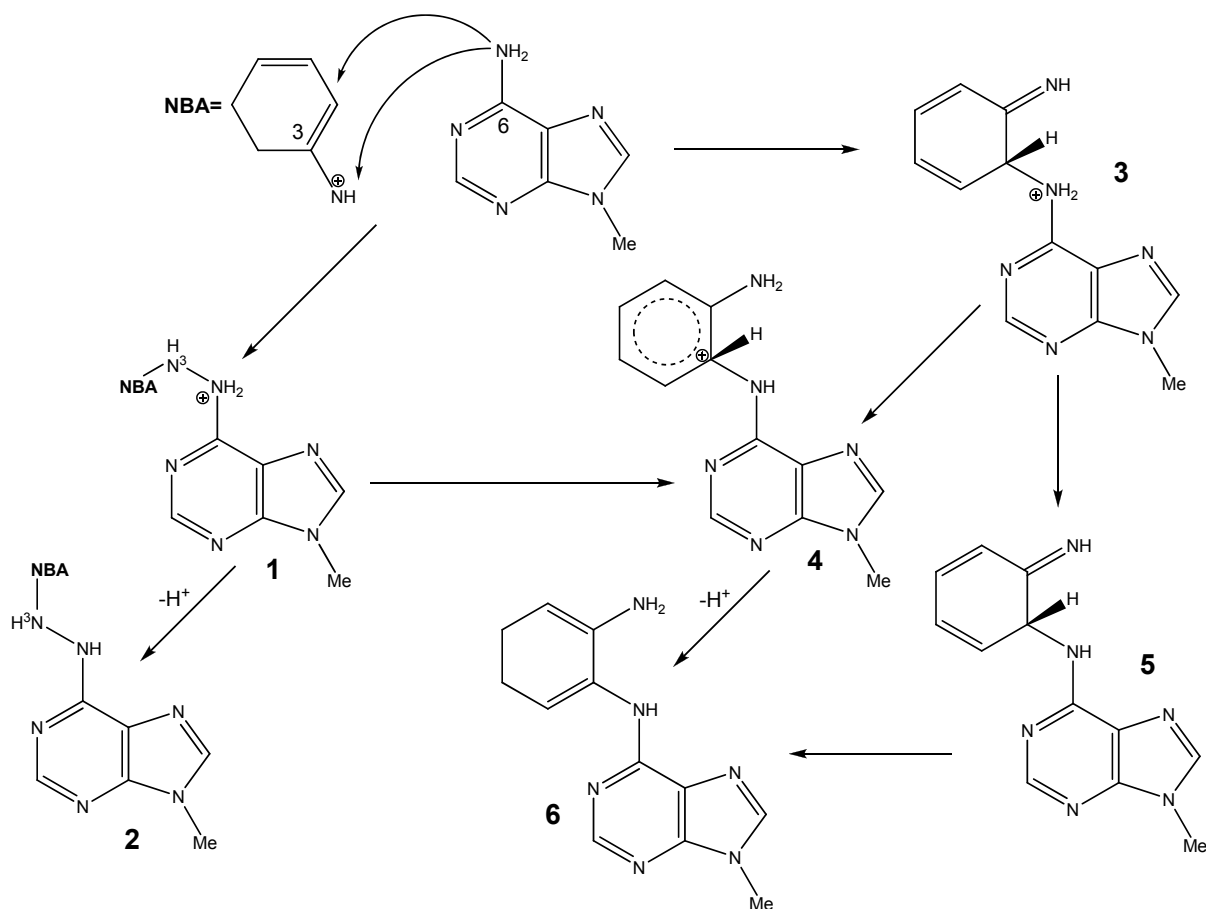

**Table S4.** The single point and zero point vibrational energies (ZPE) of the structurally optimized molecules in Hartrees (a.u.). The molecular structures are shown in Schemes S4.

| System | Energy / a.u. | ZPE / a.u.  |
|--------|---------------|-------------|
| 1      | -1290.573007  | 0.360959750 |
| 2      | -1290.218199  | 0.347970431 |
| 3      | -1290.588693  | 0.359767584 |
| 4      | -1290.617806  | 0.360349942 |
| 5      | -1290.219449  | 0.347463564 |
| 6      | -1290.262826  | 0.347933176 |

**Scheme S5** Reaction cascade of the electrophilic attack of the arylnitrenium ion of 3-NBA on C8 in adenine. The numbers correspond to the values in Table S5.

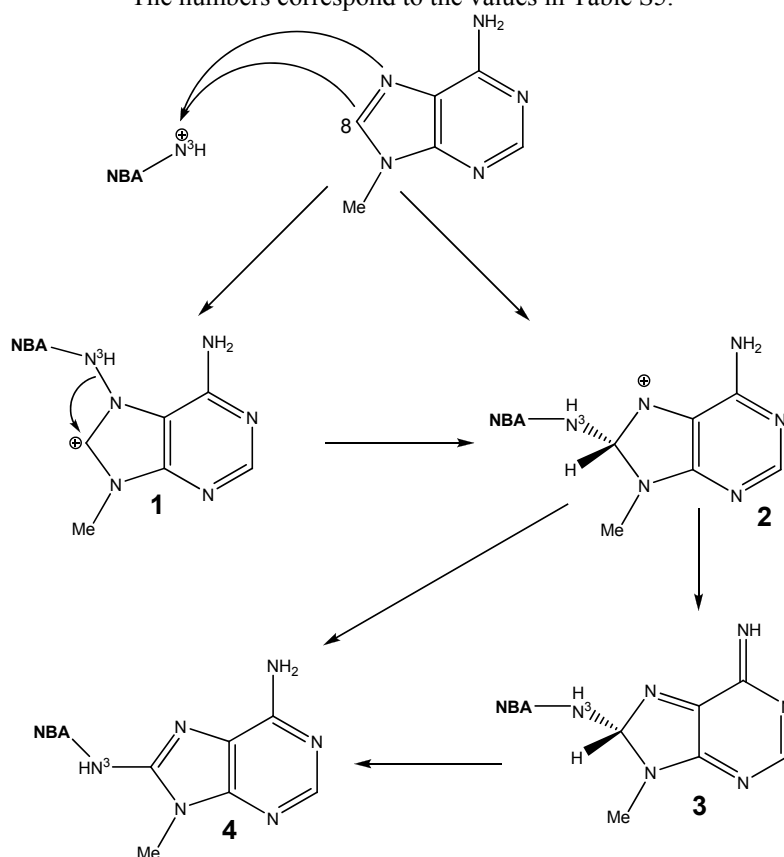

**Table S5.** The single point and zero point vibrational energies (ZPE) of the structurally optimized molecules in Hartrees (a.u.). The molecular structures are shown in Schemes S5.

| System | Energy / a.u. | ZPE / a.u.   |
|--------|---------------|--------------|
| 1      | -1290.600206  | -1265.304442 |
| 2      | -1290.558000  | 0.358983264  |
| 3      | -1290.189473  | 0.346716499  |
| 4      | -1290.187517  | 0.346128259  |

**Scheme S6** Reaction cascade of the electrophilic attack of the aryl nitrenium ion of 3-NBA on C8 in adenine. The numbers correspond to the values in Table S6.

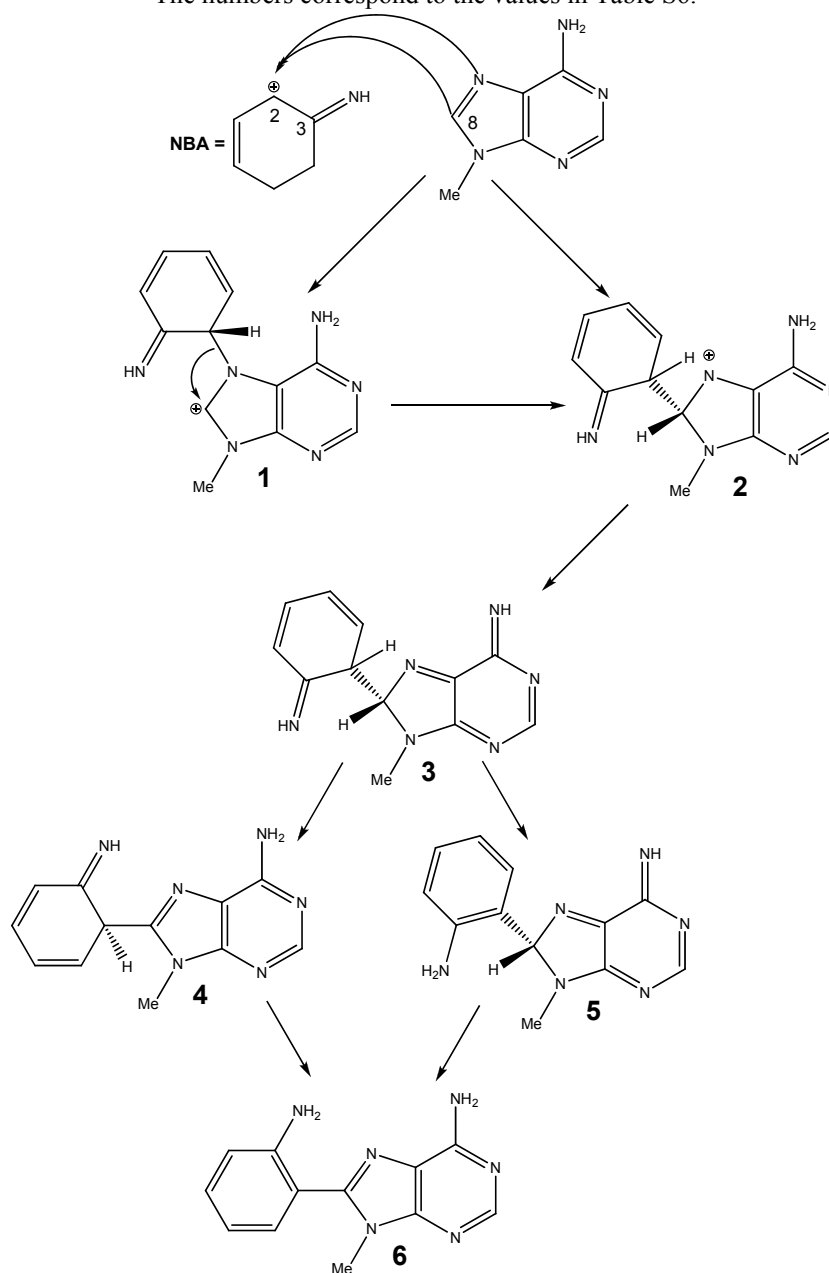

**Table S6.** The single point and zero point vibrational energies (ZPE) of the structurally optimized molecules in Hartrees (a.u.). The molecular structures are shown in Schemes S6.

| System | Energy / a.u. | ZPE / a.u.  |
|--------|---------------|-------------|
| 1      | -1290.604128  | 0.359641112 |
| 2      | -1290.565639  | 0.358703850 |
| 3      | -1290.162284  | 0.346432183 |
| 4      | -1290.232652  | 0.347085130 |
| 5      | -1290.196046  | 0.346065514 |
| 6      | -1290.274657  | 0.347684154 |
